# Supplementary material for: Treatment of 13-cis retinoic acid and 1,25-dihydroxyvitamin D3 inhibits TNF-alpha-mediated expression of MMP-9 protein and cell invasion through the suppression of JNK pathway and microRNA 221 in human pancreatic adenocarcinoma cancer cells
Source: PubMed Central journal article supplement (PMC7968633; doi:10.1371/journal.pone.0247550), 2021-03-17
Supplement: pone.0247550.s001.pdf [file pone.0247550.s001.pdf]

**Figure 1.**

**(A)**

|                                      | PANC-1 |   |     |   |     |     |     | HPAF-II |   |     |   |     |     |     |
|--------------------------------------|--------|---|-----|---|-----|-----|-----|---------|---|-----|---|-----|-----|-----|
| TNF- $\alpha$ (50 ng/ml)             | -      | + | +   | + | +   | +   | +   | -       | + | +   | + | +   | +   | +   |
| 13-cis-RA (uM)                       | 0      | 0 | 0.1 | 1 | 0   | 0.1 | 1   | 0       | 0 | 0.1 | 1 | 0   | 0.1 | 1   |
| 1 $\alpha$ , 25(OH) $_2$ D $_3$ (uM) | 0      | 0 | 0   | 0 | 0.5 | 0.5 | 0.5 | 0       | 0 | 0   | 0 | 0.5 | 0.5 | 0.5 |
| E-cadherin                           |        |   |     |   |     |     |     |         |   |     |   |     |     |     |
| N-cadherin                           |        |   |     |   |     |     |     |         |   |     |   |     |     |     |
| actin                                |        |   |     |   |     |     |     |         |   |     |   |     |     |     |

**(B)**

|                                      | PANC-1 |   |     |   |     |     |     | HPAF-II |   |     |   |     |     |     |
|--------------------------------------|--------|---|-----|---|-----|-----|-----|---------|---|-----|---|-----|-----|-----|
| TNF- $\alpha$ (50 ng/ml)             | -      | + | +   | + | +   | +   | +   | -       | + | +   | + | +   | +   | +   |
| 13-cis-RA (uM)                       | 0      | 0 | 0.1 | 1 | 0   | 0.1 | 1   | 0       | 0 | 0.1 | 1 | 0   | 0.1 | 1   |
| 1 $\alpha$ , 25(OH) $_2$ D $_3$ (uM) | 0      | 0 | 0   | 0 | 0.5 | 0.5 | 0.5 | 0       | 0 | 0   | 0 | 0.5 | 0.5 | 0.5 |
| Slug                                 |        |   |     |   |     |     |     |         |   |     |   |     |     |     |
| Twist1                               |        |   |     |   |     |     |     |         |   |     |   |     |     |     |
| lamin A                              |        |   |     |   |     |     |     |         |   |     |   |     |     |     |



**Figure 3.**

**(A)**

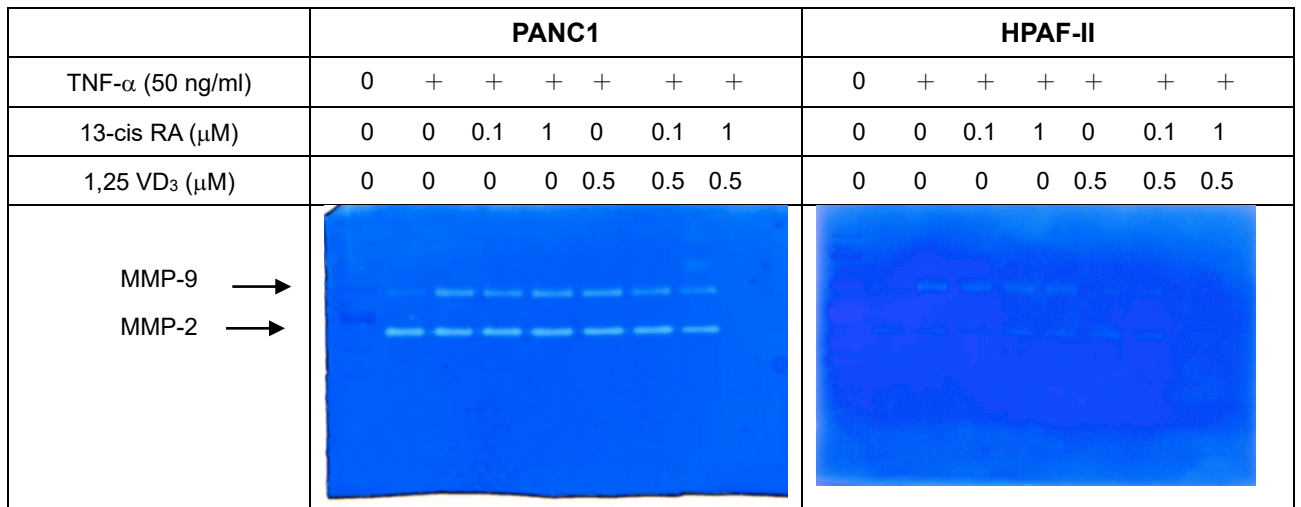

**(B)**

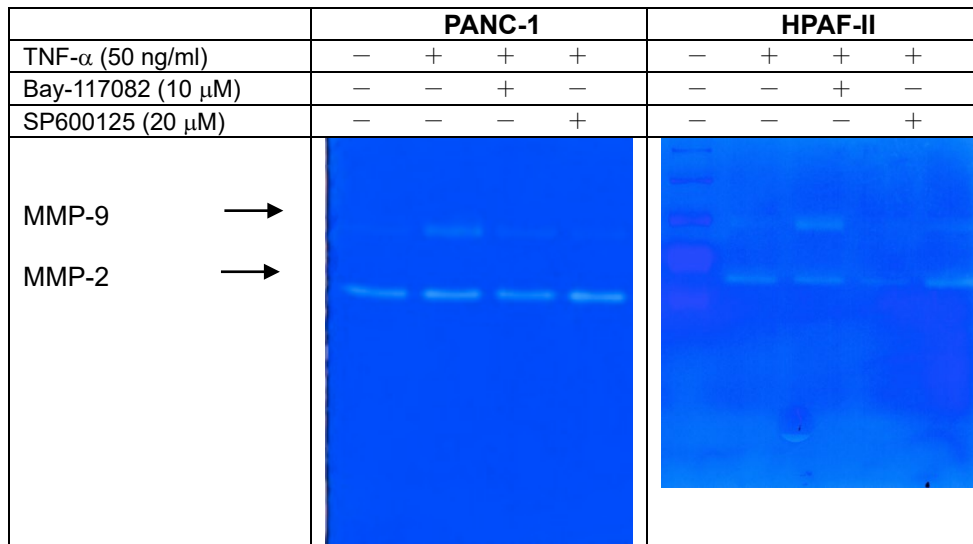

**Figure 3.**

**(C)**

|                                  | PANC-1                                                                            |   |     |   |     |     |     | HPAF-II                                                                            |   |     |   |     |     |     |
|----------------------------------|-----------------------------------------------------------------------------------|---|-----|---|-----|-----|-----|------------------------------------------------------------------------------------|---|-----|---|-----|-----|-----|
| TNF- $\alpha$ (50 ng/ml)         | 0                                                                                 | + | +   | + | +   | +   | +   | 0                                                                                  | + | +   | + | +   | +   | +   |
| 13-cis-RA (uM)                   | 0                                                                                 | 0 | 0.1 | 1 | 0   | 0.1 | 1   | 0                                                                                  | 0 | 0.1 | 1 | 0   | 0.1 | 1   |
| 1,25 VD <sub>3</sub> (uM)        | 0                                                                                 | 0 | 0   | 0 | 0.5 | 0.5 | 0.5 | 0                                                                                  | 0 | 0   | 0 | 0.5 | 0.5 | 0.5 |
| p-JNK (T183/Y185)                | 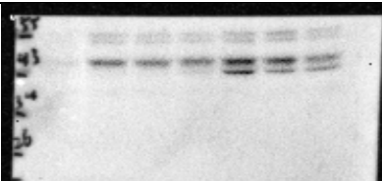 |   |     |   |     |     |     |  |   |     |   |     |     |     |
| p-I $\kappa$ B $\alpha$ (S32/36) |  |   |     |   |     |     |     |  |   |     |   |     |     |     |
| actin                            |  |   |     |   |     |     |     |  |   |     |   |     |     |     |

**(D)**

|                                                      | PANC-1                                                                              |   |     |   |     |     |     | HPAF-II                                                                              |   |     |   |     |     |     |
|------------------------------------------------------|-------------------------------------------------------------------------------------|---|-----|---|-----|-----|-----|--------------------------------------------------------------------------------------|---|-----|---|-----|-----|-----|
| TNF- $\alpha$ (50 ng/ml)                             | 0                                                                                   | + | +   | + | +   | +   | +   | 0                                                                                    | + | +   | + | +   | +   | +   |
| 13-cis-RA (uM)                                       | 0                                                                                   | 0 | 0.1 | 1 | 0   | 0.1 | 1   | 0                                                                                    | 0 | 0.1 | 1 | 0   | 0.1 | 1   |
| 1 $\alpha$ , 25(OH) <sub>2</sub> D <sub>3</sub> (uM) | 0                                                                                   | 0 | 0   | 0 | 0.5 | 0.5 | 0.5 | 0                                                                                    | 0 | 0   | 0 | 0.5 | 0.5 | 0.5 |
| p65 NF $\kappa$ B                                    | 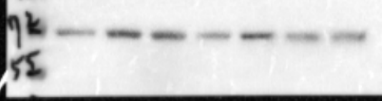 |   |     |   |     |     |     |  |   |     |   |     |     |     |
| c-fos                                                |  |   |     |   |     |     |     |  |   |     |   |     |     |     |
| p-c-jun (S63)                                        |  |   |     |   |     |     |     |  |   |     |   |     |     |     |

lamin A

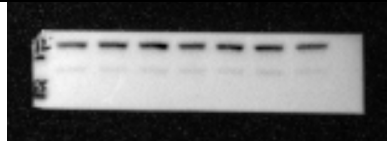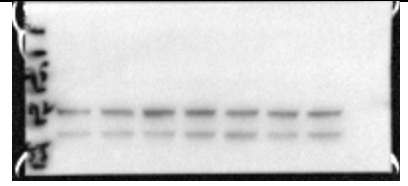

**Figure 4.**

**(A)**

|                          | PANC1                                                                               |   |   | HPAF-II                                                                               |   |   |
|--------------------------|-------------------------------------------------------------------------------------|---|---|---------------------------------------------------------------------------------------|---|---|
| TNF- $\alpha$ (50 ng/ml) | -                                                                                   | + | + | -                                                                                     | + | + |
| SP600125 (20 $\mu$ M)    | -                                                                                   | - | + | -                                                                                     | - | + |
| MMP-9                    | 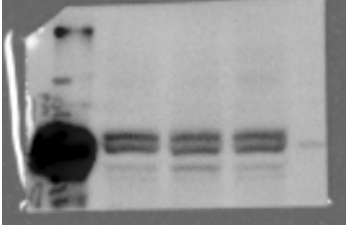   |   |   |    |   |   |
| TIMP-3                   |    |   |   |    |   |   |
| p-JNK (T183/Y185)        |  |   |   |   |   |   |
| actin                    |  |   |   |  |   |   |

|                          | PANC1 |   |   | HPAF-II |   |   |
|--------------------------|-------|---|---|---------|---|---|
| TNF- $\alpha$ (50 ng/ml) | -     | + | + | -       | + | + |
| SP600125 (20 $\mu$ M)    | -     | - | + | -       | - | + |

|               |                                                                                   |                                                                                    |
|---------------|-----------------------------------------------------------------------------------|------------------------------------------------------------------------------------|
| p-c-jun (S63) | 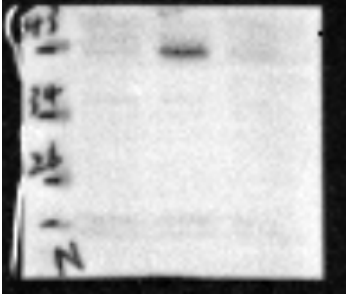 |  |
| laminA        |  |  |

(C)

|                          | PANC1                                                                               |   |   |   | HPAF-II                                                                               |   |   |   |
|--------------------------|-------------------------------------------------------------------------------------|---|---|---|---------------------------------------------------------------------------------------|---|---|---|
| TNF- $\alpha$ (50 ng/ml) | -                                                                                   | + | - | + | -                                                                                     | + | - | + |
| anti-miR-221             | -                                                                                   | - | + | + | -                                                                                     | - | + | + |
| MMP-9                    | 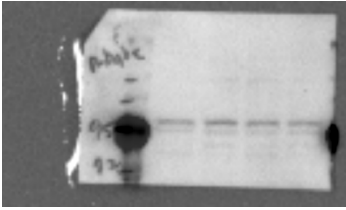 |   |   |   |  |   |   |   |
| TIMP-3                   |  |   |   |   |  |   |   |   |
| actin                    |  |   |   |   |  |   |   |   |

**Figure 5.**

**(B)**

|                                      | PANC-1                                                                             |   |     |   |     |     |     | HPAF-II                                                                             |   |     |   |     |     |     |
|--------------------------------------|------------------------------------------------------------------------------------|---|-----|---|-----|-----|-----|-------------------------------------------------------------------------------------|---|-----|---|-----|-----|-----|
| TNF- $\alpha$ (50 ng/ml)             | -                                                                                  | + | +   | + | +   | +   | +   | -                                                                                   | + | +   | + | +   | +   | +   |
| 13-cis-RA (uM)                       | 0                                                                                  | 0 | 0.1 | 1 | 0   | 0.1 | 1   | 0                                                                                   | 0 | 0.1 | 1 | 0   | 0.1 | 1   |
| 1 $\alpha$ , 25(OH) $_2$ D $_3$ (uM) | 0                                                                                  | 0 | 0   | 0 | 0.5 | 0.5 | 0.5 | 0                                                                                   | 0 | 0   | 0 | 0.5 | 0.5 | 0.5 |
| TIMP3                                | 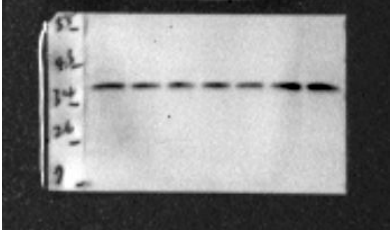  |   |     |   |     |     |     |   |   |     |   |     |     |     |
| actin                                |  |   |     |   |     |     |     |  |   |     |   |     |     |     |
